# Supplementary material for: Chronic Lymphocytic Leukemia (CLL) with Borderline Immunoglobulin Heavy Chain Mutational Status, a Rare Subgroup of CLL with Variable Disease Course
Source: MDPI journal article supplement (doi:10.3390/cancers16061095), 2024-03-08
Supplement: s1 [file s1]

**Supplementary Table S1:** Univariate Cox regression analysis for TTFT

| Variable                 | Hazard Ratio | 95% CI      | P values         |
|--------------------------|--------------|-------------|------------------|
| Sex (M vs F)             | 1.22         | 0.98 – 1.52 | 0.072            |
| Age                      | 1.02         | 1.01 – 1.03 | <b>&lt;0.001</b> |
| RAI stage (0-I vs II-IV) | 0.43         | 0.35 – 0.54 | <b>&lt;0.001</b> |
| BINET stage (A vs B-C)   | 0.35         | 0.29 – 0.44 | <b>&lt;0.001</b> |
| IGHV mutational status   |              |             |                  |
| M-IGHV                   | ref          | -           | -                |
| BL-IGHV                  | 3.76         | 2.85 – 5.93 | <b>&lt;0.001</b> |
| U-IGHV                   | 3.96         | 3.17 – 5.02 | <b>&lt;0.001</b> |
| del(11q)                 | 3.48         | 2.58 – 4.70 | <b>&lt;0.001</b> |
| del(13q)                 | 0.67         | 0.53 – 0.84 | <b>&lt;0.001</b> |
| +12                      | 1.28         | 0.94 – 1.75 | 0.116            |
| del(17p)                 | 2.88         | 2.03 – 4.09 | <b>&lt;0.001</b> |
| TP53                     | 2.65         | 1.78 – 3.96 | <b>&lt;0.001</b> |
| NOTCH1                   | 1.21         | 0.78 – 1.89 | 0.399            |
| Karyotype                |              |             |                  |
| Normal                   | ref          | -           | -                |
| <2 abnormalities         | 1.80         | 1.24 – 2.59 | <b>0.002</b>     |
| CK                       | 1.83         | 1.11 – 3.00 | <b>0.018</b>     |
| High-CK                  | 2.96         | 1.82 – 4.81 | <b>&lt;0.001</b> |

**Supplementary Table S2:** Multivariate Cox regression analysis for TTFT

| Variable                 | Hazard Ratio | 95% CI      | P values         |
|--------------------------|--------------|-------------|------------------|
| Age                      | 1.04         | 1.02 – 1.06 | <b>&lt;0.001</b> |
| RAI stage (0-I vs II-IV) | 0.82         | 0.36 – 1.84 | 0.639            |
| BINET stage (A vs B-C)   | 0.91         | 0.38 – 2.16 | 0.830            |
| IGHV mutational status   |              |             |                  |
| M-IGHV                   | ref          | -           | -                |
| BL-IGHV                  | 2.60         | 1.21 – 5.58 | <b>0.013</b>     |
| U-IGHV                   | 1.64         | 1.03 – 2.60 | <b>0.037</b>     |
| del(11q)                 | 1.59         | 0.96 – 2.65 | 0.072            |
| del(13q)                 | 0.61         | 0.40 – 0.94 | <b>0.023</b>     |
| del(17p)                 | 0.60         | 0.25 – 1.41 | 0.239            |
| TP53                     | 2.14         | 1.21 – 4.07 | <b>0.021</b>     |
| NOTCH1                   | 1.31         | 0.74 – 2.31 | 0.350            |
| Karyotype                |              |             |                  |
| Normal                   | ref          | -           | -                |
| <2 abnormalities         | 1.26         | 0.75 – 2.11 | 0.374            |
| CK                       | 1.70         | 0.90 – 3.20 | 0.102            |
| High-CK                  | 2.31         | 1.12 – 4.74 | <b>0.023</b>     |

**Supplementary Table S3:** Univariate Cox regression analysis for OS

| Variable                 | Hazard Ratio | 95% CI      | P values         |
|--------------------------|--------------|-------------|------------------|
| Sex (M vs F)             | 1.66         | 1.24 – 2.21 | <b>&lt;0.001</b> |
| Age                      | 1.08         | 1.06 – 1.09 | <b>&lt;0.001</b> |
| RAI stage (0-I vs II-IV) | 0.56         | 0.42 – 0.73 | <b>&lt;0.001</b> |
| BINET stage (A vs B-C)   | 0.46         | 0.35 – 0.60 | <b>&lt;0.001</b> |
| IGHV mutational status   |              |             |                  |
| M-IGHV                   | ref          | -           | -                |
| BL-IGHV                  | 0.97         | 0.40 – 2.40 | 0.956            |
| U-IGHV                   | 2.86         | 2.17 – 3.76 | <b>&lt;0.001</b> |
| del(11q)                 | 3.02         | 2.03 – 4.48 | <b>&lt;0.001</b> |
| del(13q)                 | 0.72         | 0.52 – 0.99 | <b>0.049</b>     |
| +12                      | 1.15         | 0.74 – 1.78 | 0.532            |
| del(17p)                 | 1.87         | 1.15 – 3.03 | <b>0.011</b>     |
| TP53                     | 1.30         | 0.66 – 2.58 | 0.449            |
| NOTCH1                   | 1.95         | 0.93 – 4.07 | 0.076            |
| Karyotype                |              |             |                  |
| Normal                   | ref          | -           | -                |
| <2 abnormalities         | 1.16         | 0.61 – 2.24 | 0.651            |
| CK                       | 1.63         | 0.75 – 3.56 | 0.217            |
| High-CK                  | 2.90         | 1.43 – 5.90 | <b>0.003</b>     |

**Supplementary Table S4:** Multivariate Cox regression analysis for OS

| Variable                 | Hazard Ratio | 95% CI      | P values         |
|--------------------------|--------------|-------------|------------------|
| Sex (M vs F)             | 2.42         | 1.09 – 5.41 | <b>0.031</b>     |
| Age                      | 1.12         | 1.07 – 1.17 | <b>&lt;0.001</b> |
| RAI stage (0-I vs II-IV) | 0.93         | 0.28 – 3.11 | 0.905            |
| BINET stage (A vs B-C)   | 0.52         | 0.15 – 1.77 | 0.292            |
| IGHV mutational status   |              |             |                  |
| M-IGHV                   | ref          | -           | -                |
| BL-IGHV                  | 0.64         | 0.72 – 5.63 | 0.686            |
| U-IGHV                   | 1.53         | 0.60 – 3.89 | 0.370            |
| del(11q)                 | 1.69         | 0.66 – 4.32 | 0.275            |
| del(13q)                 | 0.99         | 0.46 – 2.15 | 0.996            |
| del(17p)                 | 0.61         | 0.13 – 2.90 | 0.535            |
| TP53                     | 1.78         | 0.59 – 5.43 | 0.308            |
| NOTCH1                   | 2.61         | 0.95 – 7.17 | 0.063            |
| Karyotype                |              |             |                  |
| Normal                   | ref          | -           | -                |
| <2 abnormalities         | 0.80         | 0.28 – 2.31 | 0.682            |
| CK                       | 0.93         | 0.25 – 3.48 | 0.916            |
| High-CK                  | 2.00         | 0.57 – 6.97 | 0.276            |

**Supplementary Table S5:** Frequency of IGHV gene families by IGHV mutational status, only IGHV with a frequency of  $\geq 1\%$  in any group are shown.

| IGHV gene family<br>n (%) | M-IGHV    | BL-IGHV  | U-IGHV    | P values*        |
|---------------------------|-----------|----------|-----------|------------------|
| IGHV 1-2                  | 13 (3.7)  | 0        | 20 (7.3)  | <b>0.049</b>     |
| IGHV 1-3                  | 6 (1.7)   | 0        | 4 (1.5)   | 1                |
| IGHV 1-8                  | 6 (1.7)   | 0        | 3 (1.1)   | 1                |
| IGHV 2-5                  | 10 (2.9)  | 2 (6.7)  | 1 (0.4)   | <b>0.01</b>      |
| IGHV 1-69                 | 9 (2.6)   | 1 (3.3)  | 54 (19.9) | <b>&lt; 0.01</b> |
| IGHV 3-11                 | 6 (1.7)   | 0        | 9 (3.3)   | 0.39             |
| IGHV 3-15                 | 12 (3.4)  | 1 (3.3)  | 4 (1.5)   | 0.26             |
| IGHV 3-21                 | 13 (3.7)  | 7 (23.3) | 10 (3.7)  | <b>&lt; 0.01</b> |
| IGHV 3-23                 | 38 (10.9) | 5 (16.7) | 10 (3.7)  | <b>&lt; 0.01</b> |
| IGHV 3-30                 | 28 (8.0)  | 1 (3.3)  | 12 (4.4)  | 0.27             |
| IGHV 3-33                 | 10 (2.9)  | 0        | 13 (4.8)  | 0.35             |
| IGHV 3-48                 | 12 (3.4)  | 2 (6.6)  | 13 (4.8)  | 0.39             |
| IGHV 3-49                 | 3 (0.9)   | 0        | 3 (1.1)   | 1                |
| IGHV 3-53                 | 7 (2.0)   | 0        | 3 (1.1)   | 0.53             |
| IGHV 3-7                  | 31 (8.9)  | 2 (6.6)  | 5 (1.8)   | <b>&lt; 0.01</b> |
| IGHV 3-9                  | 2 (0.6)   | 1 (3.3)  | 6 (2.2)   | 0.11             |
| IGHV 3-72                 | 7 (2.0)   | 0        | 0         | 0.06             |
| IGHV 3-73                 | 1 (0.3)   | 0        | 4 (1.5)   | 0.35             |
| IGHV 3-74                 | 11 (3.1)  | 4 (13.3) | 3 (1.1)   | <b>&lt; 0.01</b> |
| IGHV 4-31                 | 8 (2.3)   | 0        | 3 (1.1)   | 0.62             |
| IGHV 4-34                 | 33 (9.4)  | 1 (3.3)  | 11 (4.0)  | <b>&lt; 0.01</b> |
| IGHV 4-39                 | 9 (2.6)   | 0        | 7 (2.6)   | 1                |
| IGHV 4-4                  | 8 (2.3)   | 0        | 4 (1.5)   | 0.75             |
| IGHV 4-59                 | 19 (5.4)  | 1 (3.3)  | 10 (3.7)  | 0.59             |
| IGHV 4-61                 | 9 (2.6)   | 0        | 3 (1.1)   | 0.88             |
| IGHV 5-51                 | 4 (1.1)   | 0        | 14 (5.1)  | <b>&lt; 0.01</b> |
| Not available             | 18 (5.1)  | 0        | 18 (6.6)  | 0.34             |

\* Overall p-values between the three groups, relevant pair-wise p-values reported in text; p-values below the significance level are indicated in bold.

**Supplementary Table S6:** BCR stereotype subsets frequency by IGHV mutational status

| <b>Subset<br/>n (%)</b> | <b>M-IGHV</b> | <b>BL-IGHV</b> | <b>U-IGHV</b> | <b>P values*</b> |
|-------------------------|---------------|----------------|---------------|------------------|
| # 1                     | 0             | 0              | 6 (2.2)       | <b>0.02</b>      |
| # 2                     | 9 (2.6)       | 3 (10)         | 2 (0.7)       | <b>&lt; 0.01</b> |
| # 5                     | 0             | 0              | 1 (0.4)       | 0.46             |
| # 6                     | 0             | 0              | 1 (0.4)       | 0.46             |
| # 8                     | 0             | 0              | 1 (0.4)       | 0.46             |
| # 12                    | 0             | 0              | 1 (0.4)       | 0.46             |
| # 28A                   | 0             | 0              | 1 (0.4)       | 0.46             |
| # 31                    | 0             | 0              | 1 (0.4)       | 0.46             |
| # 64B                   | 1 (0.3)       | 0              | 0             | <b>1</b>         |
| # 77                    | 4 (1.1)       | 0              | 0             | 0.28             |
| # 99                    | 1 (0.3)       | 0              | 2 (0.7)       | 0.64             |
| # 202                   | 0             | 0              | 3 (1.1)       | 0.20             |

\* Overall p-values between the three groups, relevant pair-wise p-values reported in text; p-values below the significance level are indicated in bold.
